# Supplementary material for: Glucosinolates, Ca, Se Contents, and Bioaccessibility in Brassica rapa Vegetables Obtained by Organic and Conventional Cropping Systems
Source: MDPI journal article supplement (doi:10.3390/foods11030350), 2022-01-26
Supplement: s1 [file s1]

## Supplementary Materials

**Table S1.** Peaks.

| Number | Name                                | Retention time |
|--------|-------------------------------------|----------------|
| 1      | Progoitrin                          | 6.2            |
| 2      | Gluconapin                          | 14.7           |
| 3      | Glucobrassicinapin                  | 18.8           |
| 4      | Glucotropaeolin (Internal standard) | 19.5           |
| 5      | Glucobrassicin                      | 21.6           |
| 6      | 4-Methoxyglucobrassicin             | 23.9           |

mAU

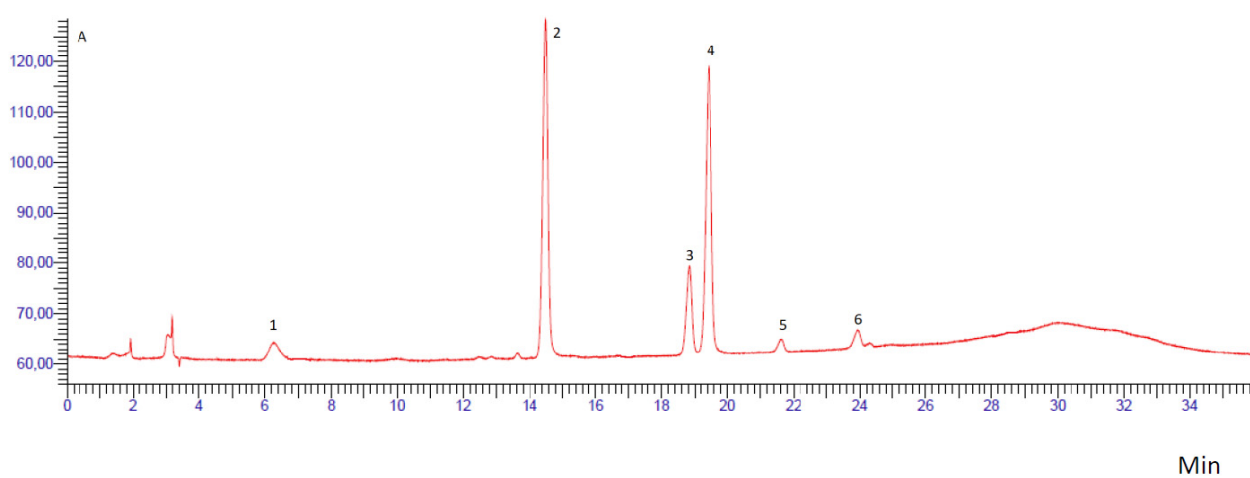

(A)

mAU

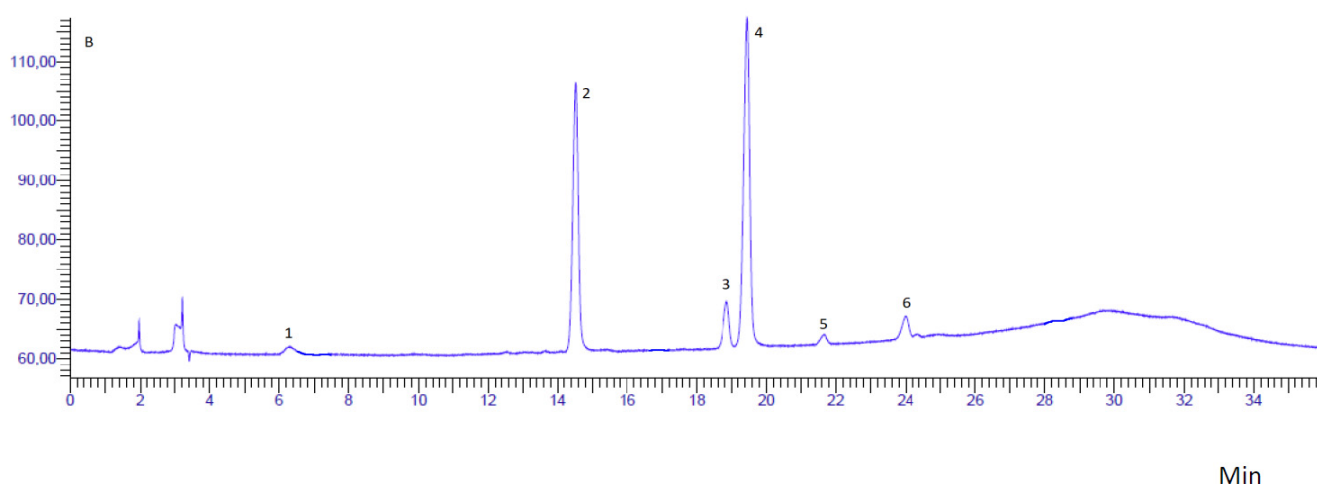

(B)

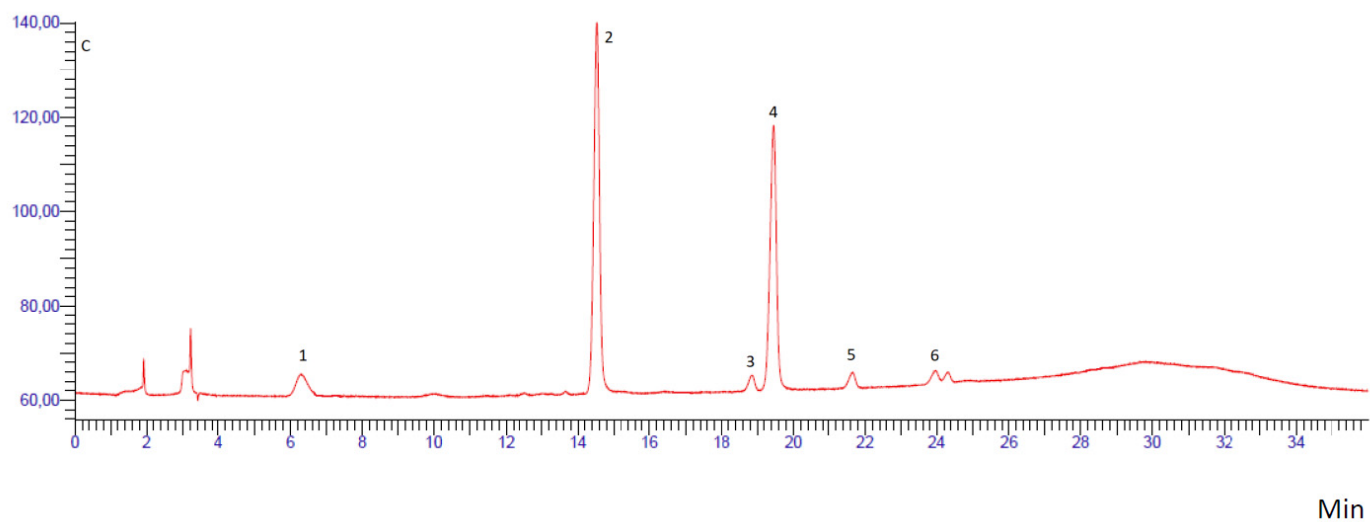

(C)

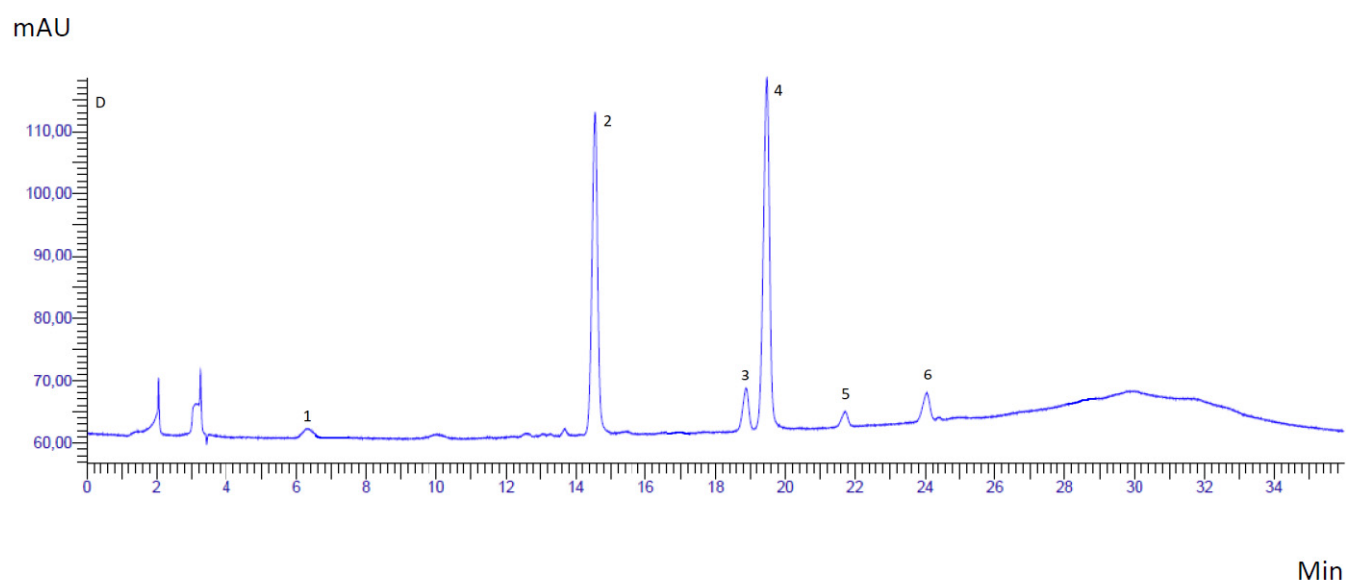

(D)

**Figure S1.** HPLC chromatograms of glucosinolate profiles in turnip greens and turnip tops of the species *Brassica rapa* grown under conventional (red) and organic (blue) conditions. Turnip greens: Conventional turnip greens (**A**) and organic turnip greens (**B**). Turnip tops: Conventional turnip tops (**C**) and organic turnip tops (**D**).
